# Supplementary material for: Cell-type-specific population dynamics of diverse reward computations
Source: PubMed Central journal article supplement (PMC10387374; doi:10.1016/j.cell.2022.08.019), 2022-09-15
Supplement: NIHMS1907966-supplement-Table_S1.pdf [file NIHMS1907966-supplement-Table_S1.pdf]

**Cell, Volume 185**

**Supplemental information**

**Cell-type-specific population dynamics  
of diverse reward computations**

**Emily L. Sylwestrak, YoungJu Jo, Sam Vesuna, Xiao Wang, Blake Holcomb, Rebecca H. Tien, Doo Kyung Kim, Lief Fenno, Charu Ramakrishnan, William E. Allen, Ritchie Chen, Krishna V. Shenoy, David Sussillo, and Karl Deisseroth**

Table S1. Statistical analysis of changes in fiber photometry fluorescence during 3CSRTT behavioral events, related to Figure 2.

| Genotype | Comparison           | Cue-Triggered Activity |          | Poke-Triggered Activity |           |
|----------|----------------------|------------------------|----------|-------------------------|-----------|
|          |                      | Pre-Cue                | Post-Cue | Pre-Poke                | Post-Poke |
| TH       | Correct vs Incorrect | 0.36                   | 0.42     | 0.32                    | ***<0.001 |
|          | Correct vs Omitted   | 0.07                   | 0.38     | 0.32                    | ***<0.001 |
| Tac1     | Correct vs Incorrect | 0.26                   | **<0.01  | *0.04                   | ***<0.001 |
|          | Correct vs Omitted   | 0.08                   | *0.03    | 0.59                    | ***<0.001 |
| ChAT     | Correct vs Incorrect | 0.01                   | n/a      | 0.17                    | **<0.01   |
|          | Correct vs Omitted   | n/a                    | n/a      | 0.17                    | 0.09      |
| Calb1    | Correct vs Incorrect | n/a                    | n/a      | 0.29                    | *0.01     |
|          | Correct vs Omitted   | n/a                    | n/a      | 0.29                    | 0.19      |
| LHb      | Correct vs Incorrect | n/a                    | n/a      | 0.27                    | **<0.01   |
|          | Correct vs Omitted   | n/a                    | n/a      | 0.84                    | **<0.01   |
